# Supplementary material
Source: publisher site journal article supplement (https://www.dovepress.com/get_supplementary_file.php?f=501809.docx)
Supplement: Supplementary file 1 [file get_supplementary_file.php]

Supplementary Table1. Baseline characteristics and embryo transfer variables comparisons in the subgroup with fibroid dimension <3cm

|  | NC | HRT | GnRH agonist-HRT | P value |
| --- | --- | --- | --- | --- |
| Number of cycles | 82 | 140 | 50 |  |
| female age (y) *(M, P25, P75)* | 35.68(32,37) | 36.17(33,40) | 35.96(33,38) | 0.767 |
| BMI (kg/m2) (*M, P25, P75)* | 22.51(20.48,24.62) | 23.13(21.10,24.80) | 22.47(20.88,24.41) | 0.155 |
| Infertility duration years (y) (*M, P25, P75)* | 3.00(1.48,4.00) | 2.79(1.00,4.00) | 3.19(1.50,4.00) | 0.533 |
| Infertility type (n, %) | | | | |
| Primary sterility | 10(12.2%) | 34(24.3%) | 16(32.0%) | 0.069 |
| Secondary sterility | 72(87.8%) | 106(75.7%) | 34(68.0%) |
| Fertilization type (n, %) | | | | |
| IVF | 72(87.8%) | 106(75.7%) | 40(80.0%) | 0.055 |
| ICSI | 10(12.2%) | 34(24.3%) | 10(20.0%) |
| Aetiology, n (%) | | | | |
| Tubal factor | 66(80.50%) | 123(87.9%) | 36(72.0%) | 0.060 |
| Ovulatory factor | 8(9.76%) | 11(7.90%) | 4(8.0%) |
| Male factor | 1(1.20%) | 4(2.90%) | 6(12.0%) |
| Others | 7(8.54%) | 2(1.30%) | 4(8.0%) |
| AFC(n) *(M, P25, P75)* | 9.07(4.75,13.00) | 8.49(4.00,11.00) | 10.52(5.75,16.25) | 0.590 |
| AMH (ng/ml) *(M, P25, P75)* | 2.29(0.69,2.78) | 2.42(0.70,3.78) | 2.43(0.84,3.30) | 0.467 |
| Basal FSH(mIU/ml) *(M, P25, P75)* | 7.15(5.53,7.53) | 8.16(5.53,8.15) | 6.72(5.82,7.88) | 0.113 |
| Basal LH(mIU/ml) *(M, P25, P75)* | 4.77(2.60,6.19) | 5.21(3.13,6.07) | 4.79(3.07,5.99) | 0.739 |
| Number of eggs *(M, P25, P75)* | 8.17(5.00,11.00) | 8.47(4.00,12.00) | 10.88(6.00,14.25) | 0.035 |
| Endometrial thickness on the day of transfer (n) *(M, P25, P75)* | 6.05(5.30,7.00) | 6.28(6.00,6.90) | 6.29(6.00,7.00) | 0.256 |
| No. of transferred embryos (n, %) | | | | |
| One embryo transferred | 50(61.0%) | 76(54.3%) | 26(52.0%) | 0.095 |
| Two embryos transferred | 32(39.0%) | 64(45.7%) | 22(44.0%) |
| Three embryos transferred | 0 | 0 | 2(4.0%) |
| Type of embryo transferred (n, %) | | | | |
| Cleavage stage embryo | 30(36.6%) | 60(42.9%) | 24(48.0%) | 0.413 |
| Blastocyst | 52(63.4%) | 80(57.1%) | 26(52.0%) |

Abbreviations: NC: natural cycle; HRT: hormone replacement therapy; GnRH-a-HRT: GnRH-a combined with hormone replacement therapy; BMI: Body mass index; FSH: follicle-stimulating hormone; LH: luteinizing hormone (LH) IVF In vitro fertilization; ICSI Intracytoplasmic sperm injection; GnRH, gonadotrophin-releasing hormone; AMH: anti-Müllerian hormone (AMH); AFC: antral follicle count.

Supplementary Table2. Baseline characteristics and embryo transfer variables comparisons in the subgroup with fibroid dimension of 3-5cm

|  | NC | HRT | GnRH agonist-HRT | P value |
| --- | --- | --- | --- | --- |
| Number of cycles | 14 | 40 | 34 |  |
| female age (y) *(M, P25, P75)* | 36.57(35,38) | 37.84(32,42) | 36.12(33,40) | 0.408 |
| BMI (kg/m2) (*M, P25, P75)* | 22.22(20.70,23.34) | 23.51(21.10,24.77) | 24.75(22.03,27.09) | 0.058 |
| Infertility duration years (y) (*M, P25, P75)* | 4.00(2.00,5.00) | 5.55(2.50,7.50) | 3.97(1.00,5.50) | 0.476 |
| Infertility type (n, %) | | | | |
| Primary sterility | 10(71.4%) | 26(65%) | 12(35.3%) | 0.055 |
| Secondary sterility | 4(28.6%) | 14(35%) | 22(64.7%) |
| Fertilization type (n, %) | | | | |
| IVF | 12(85.7%) | 38(95.0%) | 28(82.4%) | 0.084 |
| ICSI | 2(14.3%) | 2(5.0%) | 6(17.6%) |
| Aetiology, n (%) | | | | |
| Tubal factor | 10(71.4%) | 33(82.5%) | 24(70.6%) | 0.414 |
| Ovulatory factor | 2(14.4%) | 5(12.5%) | 6(17.6%) |
| Male factor | 1(7.1%) | 2(5.0%) | 2(5.9%) |
| Others | 1(7.1%) | 0 | 2(5.9%) |
| AFC (n) *(M, P25, P75)* | 6.43(2.00,10.00) | 6.42(3.00,7.00) | 8.59(4.00,11.50) | 0.203 |
| AMH (ng/ml) *(M, P25, P75)* | 2.06(0.76,3.05) | 1.77(0.58,2.25) | 2.65(1.34,2.84) | 0.388 |
| Basal FSH (mIU/ml) *(M, P25, P75)* | 9.32(4.91,18.71) | 8.06(6.17,10.27) | 7.14(5.88,8.31) | 0.135 |
| Basal LH (mIU/ml) *(M, P25, P75)* | 4.00(2.60,7.99) | 4.31(3.28,5.61) | 5.61(3.83,6.07) | 0.493 |
| Number of eggs (n) *(M, P25, P75)* | 7.43(3.00,11.00) | 6.63(2.00,9.00) | 10.65(4.00,12.25) | 0.535 |
| Endometrial thickness on the day of transfer (cm)  *(M, P25, P75)* | 6.21(5.20,6.80) | 6.36(6.00,7.00) | 5.78(5.00,6.93) | 0.083 |
| No. of transferred embryos (n, %) | | | | |
| One embryo transferred | 2(14.3%) | 10(25%) | 12(35.3%) | 0.302 |
| Two embryos transferred | 12(85.7%) | 30(75%) | 22(64.7%) |
| Three embryos transferred | 0 | 0 | 0 |
| Type of embryo transferred (n, %) | | | | |
| Cleavage stage embryo | 12(85.7%) | 28(70.0%) | 18(52.9%) | 0.071 |
| Blastocyst | 2(14.3%) | 12(30.0%) | 16(47.1%) |

Abbreviations: NC: natural cycle; HRT: hormone replacement therapy; GnRH-a-HRT: GnRH-a combined with hormone replacement therapy; BMI: Body mass index; FSH: follicle-stimulating hormone; LH: luteinizing hormone (LH) IVF In vitro fertilization; ICSI Intracytoplasmic sperm injection; GnRH, gonadotrophin-releasing hormone; AMH: anti-Müllerian hormone (AMH); AFC: antral follicle count.

Supplementary Table3. Baseline characteristics and embryo transfer variables comparisons in the subgroup with a single fibroid (N=1)

|  | NC | HRT | GnRH agonist-HRT | P value |
| --- | --- | --- | --- | --- |
| Number of cycles | 54 | 116 | 58 |  |
| female age (y) *(M, P25, P75)* | 34.33(31.00,36.00) | 35.53(32.00,39.25) | 36.28(33.00,39.50) | 0.074 |
| BMI (kg/m2) (*M, P25, P75)* | 22.61(20.70,25.07) | 23.41(21.23,24.81) | 23.32(21.10,24.93) | 0.213 |
| Infertility duration years (y) (*M, P25, P75)* | 3.00(1.00,4.00) | 3.62(1.00,6.00) | 3.89(1.88,4.25) | 0.245 |
| Infertility type (n, %) | | | | |
| Primary sterility | 17(31.5%) | 44(37.9%) | 18(31.00%) | 0.108 |
| Secondary sterility | 37(68.5%) | 72(62.1%) | 40(69.00%) |
| Fertilization type (n, %) | | | | |
| IVF | 50(92.6%) | 102(87.9%) | 50(86.2%) | 0.540 |
| ICSI | 4(7.4%) | 14(12.1%) | 8(13.8%) |
| Aetiology, n (%) | | | | |
| Tubal factor | 46(85.2%) | 102(87.9%) | 45(77.6%) | 0.103 |
| Ovulatory factor | 4(7.4%) | 10(8.6%) | 7(12.1%) |
| Male factor | 2(3.7%) | 2(1.7%) | 4(6.90%) |
| Others | 2(3.7%) | 2(1.7%) | 2(3.40%) |
| AFC (n) *(M, P25, P75)* | 9.41(3.00,13.00) | 9.61(5.75,12.25) | 10.48(5.75,14.50) | 0.584 |
| AMH (ng/ml) *(M, P25, P75)* | 2.32(0.67,3.41) | 2.94(0.96,4.40) | 2.37(0.91,3.27) | 0.121 |
| Basal FSH (mIU/ml) *(M, P25, P75)* | 6.44(5.53,7.49) | 6.91(5.57,7.65) | 7.45(5.99,7.99) | 0.024 |
| Basal LH (mIU/ml) *(M, P25, P75)* | 4.57(2.41,6.20) | 4.98(3.33,6.49) | 6.46(3.62,5.99) | 0.176 |
| Number of eggs (n) *(M, P25, P75)* | 9.00(5.00,12.00) | 9.65(5.00,13.00) | 11.38(5.75,16.00) | 0.176 |
| Endometrial thickness on the day of transfer (cm)  *(M, P25, P75)* | 5.84(5.00,7.00) | 6.26(6.00,7.00) | 6.03(5.68,7.00) | 0.121 |
| No. of transferred embryos (n, %) | | | | |
| One embryo transferred | 38(70.4%) | 64(55.2%) | 24(41.4%) | 0.209 |
| Two embryos transferred | 16(29.6%) | 52(44.8%) | 34(58.6%) |
| Three embryos transferred | 0 | 0 | 0 |
| Type of embryo transferred (n, %) | | | | |
| Cleavage stage embryo | 16(29.6%) | 38(32.8%) | 26(44.8%) | 0.183 |
| Blastocyst | 38(70.4%) | 78(67.2%) | 32(55.2%) |

Abbreviations: NC: natural cycle; HRT: hormone replacement therapy; GnRH-a-HRT: GnRH-a combined with hormone replacement therapy; BMI: Body mass index; FSH: follicle-stimulating hormone; LH: luteinizing hormone (LH) IVF In vitro fertilization; ICSI Intracytoplasmic sperm injection; GnRH, gonadotrophin-releasing hormone; AMH: anti-Müllerian hormone (AMH); AFC: antral follicle count.

Supplementary Table4. Baseline characteristics and embryo transfer variables in the subgroup with two or more fibroids (N≥2)

|  | NC | HRT | GnRH agonist-HRT | P value |
| --- | --- | --- | --- | --- |
| Number of cycles | 42 | 64 | 26 |  |
| female age (y) *(M, P25, P75)* | 37.71(34.00,40.00) | 38.31(34.25,41.75) | 35.46(34.50,38.00) | 0.054 |
| BMI (kg/m2) (*M, P25, P75)* | 22.29(20.46,24.45) | 22.85(20.70,24.76) | 23.56(20.81,26.33) | 0.193 |
| Infertility duration years (y) (*M, P25, P75)* | 3.33(2.00,4.13) | 2.95(1.00,3.38) | 2.65(1.38,4.00) | 0.619 |
| Infertility type (n, %) | | | | |
| Primary sterility | 12(28.6%) | 16(25.0%) | 10(38.5%) | 0.441 |
| Secondary sterility | 30(71.4%) | 48(75.0%) | 16(61.5%) |
| Fertilization type (n, %) | | | | |
| IVF | 34(81.0%) | 42(65.6%) | 18(69.2%) | 0.227 |
| ICSI | 8(19.0%) | 22(34.4%) | 8(30.8%) |
| Aetiology, n (%) | | | | |
| Tubal factor | 30(71.4%) | 54(84.4%) | 15(57.7%) | 0.065 |
| Ovulatory factor | 6(14.3%) | 6(9.4%) | 3(11.5%) |
| Male factor | 0 | 4(6.2%) | 4(15.4%) |
| Others | 6(14.3%) | 0 | 4(15.4%) |
| AFC (n) *(M, P25, P75)* | 7.76(5.00,9.00) | 5.25(2.00,7.75) | 9.00(5.50,9.00) | 0.511 |
| AMH (ng/ml) *(M, P25, P75)* | 2.18(0.76,2.54) | 1.12(0.36,1.39) | 2.85(1.20,2.82) | 0.101 |
| Basal FSH (mIU/ml) *(M, P25, P75)* | 8.79(5.56,7.82) | 8.33(5.67,6.09) | 5.61(3.49,7.68) | 0.088 |
| Basal LH (mIU/ml) *(M, P25, P75)* | 5.76(3.06,7.05) | 5.09(3.05,5.26) | 4.37(2.13,6.01) | 0.340 |
| Number of eggs (n) *(M, P25, P75)* | 6.86(3.75,9.00) | 5.28(2.00,7.00) | 6.77(5.50,9.50) | 0.412 |
| Endometrial thickness on the day of transfer (cm)  *(M, P25, P75)* | 6.37(6.00,7.00) | 6.37(6.00,6.80) | 6.19(5.80,6.78) | 0.439 |
| No. of transferred embryos (n, %) | | | | |
| One embryo transferred | 14 | 22 | 14 | 0.011 |
| Two embryos transferred | 28 | 42 | 10 |
| Three embryos transferred | 0 | 0 | 2 |
| Type of embryo transferred (n, %) | | | | |
| Cleavage stage embryo | 26(61.9%) | 50(78.1%) | 16(61.5%) | 0.124 |
| Blastocyst | 16(38.1%) | 14(21.9%) | 10(38.5%) |

Abbreviations: NC: natural cycle; HRT: hormone replacement therapy; GnRH-a-HRT: GnRH-a combined with hormone replacement therapy; BMI: Body mass index; FSH: follicle-stimulating hormone; LH: luteinizing hormone (LH) IVF In vitro fertilization; ICSI Intracytoplasmic sperm injection; GnRH, gonadotrophin-releasing hormone; AMH: anti-Mülerian hormone (AMH); AFC: antral follicle count.

Table 5. Multivariate logistic regression analysis of factors associated with LBR in subgroups

|  | Dimension of fibroids | | | | Number of fibroids | | | |
| --- | --- | --- | --- | --- | --- | --- | --- | --- |
|  | <3cm | | 3-5cm | | N=1 | | N≥2 | |
| Clinical indicators | OR (95%CI) | P-value | OR (95%CI) | P-value | OR (95%CI) | P-value | OR (95%CI) | P-value |
| Female age(y) | 0.676(0.884-1.087) | 0.709 | 0.844(0.683-1.043) | 0.117 | 0.974(0.877-1.082) | 0.628 | 1.046(0.867-1.262) | 0.636 |
| BMI | 0.755(0.618-0.923) | 0.006 | 0.740(0.434-1.263) | 0.269 | 0.869(0.731-1.033) | 0.112 | 1.939(1.194-3.151) | 0.007 |
| AMH | 1.211(0.916-1.599) | 0.179 | 1.164(0.432-3.134) | 0.764 | 0.846(0.627-1.143) | 0.277 | 0.675(0.342-1.331) | 0.064 |
| AFC | 1.012(0.904-1.134) | 0.831 | 1.009(0.798-1.274) | 0.943 | 1.132(0.907-1.273) | 0.083 | 0.564(0.333-0.956) | 0.034 |
| Basal FSH | 0.738(0.565-1.064) | 0.062 | 2.304(0.722-7.348) | 0.159 | 0.869(0.657-1.149) | 0.324 | 1.023(0.722-1.293) | 0.221 |
| Fertilization type | | | | | | | | |
| IVF | Ref. |  | Ref. |  | Ref. |  | Ref. |  |
| ICSI | 0.671(0.226-1.999) | 0.474 | 0.818(0.606-5.881) | 0.935 | 0.895(0.249-3.216) | 0.865 | 0.444(0.065-3.057) | 0.244 |
| Endometrial thickness on the day of transfer (mm) | 0.942(0.595-1.491) | 0.798 | 2.832(1.897-4.339) | 0.004 | 1.133(0.710-1.809) | 0.600 | 0.864(0.813-2.695) | 0.600 |
| Number of transferred embryos | 0.734(0.321-1.675) | 0.462 | 1.179(0.944-1.471) | 0.146 | 1.007(0.937-1.081) | 0.859 | 0.564(0.176-1.452) | 0.322 |
| Type of embryo transferred | | | | | | | | |
| Cleavage-stage embryo | Ref. |  | Ref. |  | Ref. |  | Ref. |  |
| Blastocyst | 0.119(0.427-1.024) | 0.606 | 1.182(0.422-1.840) | 0.221 | 0.765(0.260-2.254) | 0.627 | 0.083(0.007-1.016) | 0.052 |
| Endometrial preparation regimens | | | | | | | | |
| GnRH agonist-HRT | Ref. |  | Ref. |  | Ref. |  | Ref. |  |
| HRT | 0.247(0.175-0.755) | 0.036 | 0.323(0.066-0.898) | 0.014 | 0.606(0.216-0.907) | 0.048 | 0.486(0.025-0.652 | 0.015 |
| NC | 0.166(0.049-0.558) | 0.004 | 0.104(0.023-0.0.812) | 0.012 | 0.302(0.112-0.811) | 0.018 | 0.024(0.001-0.589) | 0.022 |

Notes: Adjusted by female age, BMI, AMH, AFC, basal FSH, fertilization type, endometrial thickness on the day of transfer; number of transferred embryos, type of embryo transferred, maximum fibroid diameter, quantity of fibroids, and Endometrial preparation regimens.

Abbreviations: NC: natural cycle; HRT: hormone replacement therapy; GnRH-a-HRT: GnRH-a combined with hormone replacement therapy; BMI: Body mass index; FSH: follicle-stimulating hormone; LH: luteinizing hormone (LH) IVF In vitro fertilization; ICSI Intracytoplasmic sperm injection; GnRH, gonadotrophin-releasing hormone; AMH: anti-Müllerian hormone (AMH); AFC: antral follicle count; OR: odds ratio; CI: confidence interval.
